# Supplementary material for: Seafloor heterogeneity influences the biodiversity–ecosystem functioning relationships in the deep sea
Source: PubMed Central journal article supplement (PMC4876447; doi:10.1038/srep26352), 2016-05-23

1 **Seafloor heterogeneity influences the biodiversity–ecosystem**  
2 **functioning relationships in the deep sea**

3

4

5 Daniela Zeppilli<sup>1,2</sup>, Antonio Pusceddu<sup>1</sup>, Fabio Trincardi<sup>3</sup>, Roberto Danovaro<sup>1,4</sup>

6

7 *<sup>1</sup>Department of Life and Environmental Sciences, Università Politecnica delle Marche, Via Brecce*  
8 *Bianche, 60131 Ancona, Italy*

9 *<sup>2</sup>IFREMER, Centre Brest, REM/EEP/LEP, Institut Carnot Ifremer-EDROME, ZI de la pointe du*  
10 *diable, CS10070, F-29280 Plouzané, France*

11 *<sup>3</sup>ISMAR (CNR), via Gobetti 101, 40129 Bologna, Italy*

12 *<sup>4</sup>Stazione Zoologica Anton Dohrn, Villa Comunale, 80121, Naples, Italy.*

13

14

15

16

17

18

19

20

## 21 **Supplementary Information**

### 22 **Seabed digital mapping**

23 A bathymetric map of the South-Western Adriatic Margin was acquired using a Kongsberg-Simrad  
24 EM300 multi-beam echo 125 sounder with nominal sonar frequency of 30 kHz and angular  
25 coverage sector of 135 beams per 126 ping at 1°. The multibeam data processing was carried out  
26 using CARIS HIPS and SIPS 7.0. The processing methodology applied implies the creation of a 2D  
27 and 3D best-fit interpolated surface using different algorithms and grid resolutions. Following the  
28 analysis of the data errors, the definition of a strategy to solve them includes: 1) the correction of  
29 the motion sensor calibration parameters; 2) the sound speed correction applying a ray-tracing  
30 technique; 3) the manual cleaning of the spikes (beam removal) in the areas where they are visible  
31 on the 2D and 3D surface; 4) the automatic filtering for a depth window, by beam number or slope  
32 between points. After the data correction and cleaning, the surface obtained is converted in ASCII  
33 ESRI format and merged with the mosaic tool available in ArcGIS 9.3. The ArcGIS Spatial Analyst  
34 tool was applied to derive the hill shade, the contours and the slope maps from the DTM.

35 Chirp-sonar profiles were gathered using a hull-mounted 16-transducer source with a sweep  
36 modulated 2-7-kHz outgoing signal equivalent to a 3.5 kHz profiler, allowing vertical resolution of  
37 0.5 m or better. High-resolution seismic profiles were gathered using a 16 transducers hull-mounted  
38 Chirp-sonar profiler with a sweep modulated outgoing signal equivalent to 3.5 kHz with vertical  
39 resolution of 0.5 m or less. Seafloor morphology and backscatter pattern come from a 30 kHz TOBI  
40 side scan sonar mosaic acquired during the cruises SETE\_06 and BARCA\_07. Differential GPS  
41 assured ship positioning every 5 s; TOBI was positioned by calculating accurately its distance  
42 behind the ship using a HPR.

43 **Table S1.** Location, depth, typology, water content, porosity and percentage of mud and sand in the sediments, mean, sorting, skewness and kurtosis  
 44 of the grains, biopolymeric carbon and phytopigments contents in the investigated sediments (sd = standard deviation; na= not available).

| Latitude   | Longitude  | Depth | Sampling site typology   | Water Content | Porosity | Mean | Sorting      | Skewness | Kurtosis | Sand | Mud | Biopolymeric C       | Phytopigments |                      |       |
|------------|------------|-------|--------------------------|---------------|----------|------|--------------|----------|----------|------|-----|----------------------|---------------|----------------------|-------|
| (N)        | (E)        | (m)   |                          | (%)           |          | (X)  | ( $\sigma$ ) | (Sk)     | (K)      | (%)  | (%) | mg C g <sup>-1</sup> | sd            | $\mu\text{g g}^{-1}$ | sd    |
| 41° 47.34' | 17° 01.85' | 714   | Furrow 1a                | 24            | 0.4      | 2.2  | 3.1          | 0.8      | 2.1      | 84   | 16  | 0.36                 | 0.06          | 3.04                 | 0.77  |
| 41° 47.34' | 17° 01.84' | 712   | Furrow 1b                | 24            | 0.4      | 2.2  | 3.1          | 0.8      | 2.1      | 84   | 16  | 0.56                 | 0.10          | 1.36                 | 0.19  |
| 41° 52.56' | 16° 56.86' | 525   | Sand Wave 1              | 43            | 0.5      | 4.2  | 4.2          | 0.5      | 0.6      | 64   | 36  | 1.55                 | 0.92          | 25.35                | 12.23 |
| 41° 50.48' | 16° 59.08' | 596   | Sand Wave 2              | 35            | 0.5      | 4.2  | 4.2          | 0.6      | 0.6      | 64   | 36  | 0.55                 | 0.28          | 18.59                | 6.75  |
| 41° 52.54' | 17° 00.47' | 590   | Mud Wave 1down           | 47            | 0.6      | 5.4  | 4.4          | 0.0      | 0.5      | 48   | 52  | 1.05                 | 0.10          | 3.15                 | 0.21  |
| 41° 52.79' | 17° 00.33' | 572   | Mud Wave 1up             | 70            | 0.8      | 8.6  | 2.6          | -0.2     | 0.9      | 8    | 92  | 1.61                 | 0.06          | 14.58                | 3.38  |
| 41° 53.46' | 16° 59.85' | 556   | Mud Wave 2 down          | 46            | 0.8      | 8.2  | 2.7          | -0.1     | 1.0      | 9    | 91  | 1.11                 | 0.09          | 3.06                 | 0.67  |
| 41° 53.68' | 16° 59.70' | 557   | Mud Wave 2 up            | 53            | 0.8      | 8.8  | 2.8          | -0.3     | 1.0      | 12   | 88  | 1.78                 | 0.05          | 9.42                 | 1.35  |
| 41° 53.97' | 16° 59.48' | 550   | Mud Wave 3 down          | 50            | 0.8      | 8.8  | 2.3          | 0.0      | 0.8      | 4    | 96  | 0.92                 | 0.11          | 6.07                 | 0.04  |
| 41° 54.21' | 16° 59.31' | 524   | Mud Wave 3 up            | 58            | 0.8      | 8.6  | 2.9          | -0.3     | 1.0      | 11   | 89  | 1.95                 | 0.32          | 13.80                | 3.04  |
| 42° 02.75' | 16° 51.32' | 328   | Inside Trough            | 50            | 0.6      | 5.5  | 4.3          | 0.1      | 0.6      | 48   | 52  | 1.54                 | 0.38          | 4.32                 | 1.02  |
| 42° 02.78' | 16° 51.57' | 318   | Outside Trough           | 44            | 0.7      | 6.3  | 4.1          | 0.0      | 0.6      | 46   | 54  | 0.99                 | 0.08          | 8.25                 | 1.75  |
| 41° 51.76' | 17° 03.49' | 718   | Inside Landslide Scar    | 70            | 0.8      | 8.5  | 2.9          | -0.3     | 1.1      | 12   | 88  | 3.29                 | 0.41          | 4.22                 | 0.99  |
| 41° 51.62' | 17° 02.48' | 667   | Outside Landslide Scar   | 63            | 0.8      | 8.5  | 2.9          | -0.3     | 1.1      | 12   | 88  | 1.92                 | 0.34          | 3.85                 | 0.61  |
| 41° 39.31' | 17° 08.38' | 637   | Depositional Structure 1 | 56            | 0.5      | 3.6  | 3.6          | 0.5      | 2.5      | 79   | 21  | 0.64                 | 0.04          | 2.41                 | 0.47  |
| 41° 39.47' | 17° 08.14' | 620   | Depositional Structure 2 | 63            | 0.5      | 3.7  | 3.6          | 0.5      | 1.9      | 77   | 23  | 1.01                 | 0.07          | 4.24                 | 0.47  |
| 41° 40.13' | 17° 08.82' | 681   | Depositional Structure 3 | 65            | 0.5      | 3.1  | 3.9          | 0.9      | 0.9      | 75   | 25  | 2.45                 | 0.56          | 6.04                 | 1.04  |
| 42° 13.95' | 16° 54.22' | 584   | Draped sediments         | 38            | na       | na   | na           | na       | na       | 71   | 29  | 2.51                 | 0.40          | 8.78                 | 1.17  |

45

46

47 **Table S2.** Total meiofaunal abundance, individual nematode biomass and total meiofaunal biomass  
 48 (sd = standard deviation) in the sampled sites.

| Sampling Site          | Total meiofaunal abundance |       | Individual nematode biomass |      | Total meiofaunal biomass |      |
|------------------------|----------------------------|-------|-----------------------------|------|--------------------------|------|
|                        | ind 10cm <sup>-2</sup>     | sd    | µgC ind <sup>-1</sup>       | sd   | µgC 10cm <sup>-2</sup>   | sd   |
| Furrow 1a              | 114.0                      | 88.1  | 0.04                        | 0.01 | 5.1                      | 4.0  |
| Furrow 1b              | 53.6                       | 12.3  | 0.03                        | 0.01 | 3.1                      | 2.0  |
| Sand Wave 1            | 280.9                      | 88.7  | 0.05                        | 0.01 | 29.6                     | 21.6 |
| Sand Wave 2            | 162.0                      | 79.7  | 0.06                        | 0.02 | 23.5                     | 19.5 |
| Mud Wave 1 down        | 180.3                      | 77.0  | 0.04                        | 0.00 | 14.8                     | 4.5  |
| Mud Wave 1 up          | 436.4                      | 149.7 | 0.09                        | 0.05 | 48.4                     | 6.8  |
| Mud Wave 2 down        | 182.0                      | 116.3 | 0.15                        | 0.08 | 29.4                     | 15.9 |
| Mud Wave 2 up          | 213.0                      | 68.7  | 0.1                         | 0.08 | 57.1                     | 36.9 |
| Mud Wave 3 down        | 206.1                      | 115.4 | 0.07                        | 0.04 | 24.0                     | 13.8 |
| Mud Wave 3 up          | 304.5                      | 89.1  | 0.06                        | 0.03 | 23.9                     | 5.0  |
| Inside Trough          | 561.2                      | 164.3 | 0.12                        | 0.06 | 96.6                     | 33.4 |
| Outside Trough         | 504.4                      | 220.7 | 0.12                        | 0.08 | 81.0                     | 23.4 |
| Inside Scar            | 47.0                       | 7.8   | 0.05                        | 0.05 | 2.9                      | 2.3  |
| Outside Scar           | 149.9                      | 18.9  | 0.03                        | 0.02 | 8.5                      | 5.8  |
| Depositional Struct. 1 | 172.2                      | 40.5  | 0.13                        | 0.09 | 24.4                     | 16.0 |
| Depositional Struct. 2 | 276.7                      | 117.5 | 0.06                        | 0.02 | 22.1                     | 8.2  |
| Depositional Struct. 3 | 290.1                      | 72.3  | 0.05                        | 0.02 | 24.4                     | 8.6  |
| Draped Sediments       | 126.7                      | 35.8  | 0.06                        | 0.02 | 9.3                      | 1.4  |

49

50 **Table S3.** Meiofaunal community structure. Distribution of higher taxa in the investigated  
 51 morphologies (including draped sediments), structures, in the up-/down-slope flanks of the mud  
 52 waves and in the sediment inside and outside the trough and the scar (+ indicate the presence of taxa,  
 53 - indicate the absence).

|              | <b>Morphologies</b> |                   |               |             |                        |                    |
|--------------|---------------------|-------------------|---------------|-------------|------------------------|--------------------|
|              | <b>Furrow</b>       | <b>Sed. Waves</b> | <b>Trough</b> | <b>Scar</b> | <b>Dep. Structures</b> | <b>Draped Sed.</b> |
| Nematodes    | +                   | +                 | +             | +           | +                      | +                  |
| Copepods     | +                   | +                 | +             | +           | +                      | +                  |
| Polychaetes  | +                   | +                 | +             | +           | +                      | +                  |
| Ostracods    | -                   | +                 | +             | +           | +                      | -                  |
| Kinorhynchs  | +                   | +                 | +             | +           | +                      | +                  |
| Oligochaetes | -                   | -                 | +             | -           | -                      | -                  |
| Tardigrades  | +                   | +                 | +             | +           | +                      | +                  |
| Gastrotrichs | -                   | +                 | -             | -           | -                      | -                  |
| Amphipods    | -                   | +                 | -             | -           | -                      | -                  |
| Isopods      | -                   | +                 | +             | +           | +                      | -                  |
| Acarines     | +                   | +                 | +             | -           | +                      | -                  |
| Priapulids   | +                   | +                 | +             | +           | +                      | +                  |
| Decapods     | -                   | +                 | -             | -           | -                      | -                  |
| Gastropods   | -                   | +                 | -             | -           | -                      | -                  |
| Bryozoans    | -                   | -                 | -             | -           | +                      | -                  |

54

Table S3 (continue)

|              | Structures     |                |               |               |               |                   |                   |                   |  |
|--------------|----------------|----------------|---------------|---------------|---------------|-------------------|-------------------|-------------------|--|
|              | Sand Wave<br>1 | Sand Wave<br>2 | Mud Wave<br>1 | Mud Wave<br>2 | Mud Wave<br>3 | Dep. Struct.<br>1 | Dep. Struct.<br>2 | Dep. Struct.<br>3 |  |
| Nematodes    | +              | +              | +             | +             | +             | +                 | +                 | +                 |  |
| Copepods     | +              | +              | +             | +             | +             | +                 | +                 | +                 |  |
| Polychaetes  | +              | +              | +             | +             | +             | +                 | -                 | +                 |  |
| Ostracods    | +              | +              | +             | -             | -             | +                 | +                 | -                 |  |
| Kinorhynchs  | +              | -              | +             | +             | +             | +                 | +                 | +                 |  |
| Oligochaetes | -              | -              | -             | -             | -             | -                 | -                 | -                 |  |
| Tardigrades  | -              | -              | +             | +             | +             | +                 | +                 | +                 |  |
| Gastrotrichs | -              | -              | -             | +             | +             | -                 | -                 | -                 |  |
| Amphipods    | -              | -              | -             | +             | -             | -                 | -                 | -                 |  |
| Isopods      | -              | -              | +             | -             | +             | -                 | -                 | +                 |  |
| Acarines     | -              | -              | +             | -             | -             | +                 | +                 | +                 |  |
| Priapulids   | -              | +              | +             | +             | +             | +                 | +                 | -                 |  |
| Decapods     | -              | -              | +             | -             | -             | -                 | -                 | -                 |  |
| Gastropods   | -              | -              | -             | -             | +             | -                 | -                 | -                 |  |
| Bryozoans    | -              | -              | -             | -             | -             | -                 | -                 | +                 |  |

58

59

Table S3 (continue)

|              | Inside Structures |    |            |    |            |    |        |         |        |         |
|--------------|-------------------|----|------------|----|------------|----|--------|---------|--------|---------|
|              | Mud Wave 1        |    | Mud Wave 2 |    | Mud Wave 3 |    | Trough |         | Scar   |         |
|              | Down              | Up | Down       | Up | Down       | Up | Inside | Outside | Inside | Outside |
| Nematodes    | +                 | +  | +          | +  | +          | +  | +      | +       | +      | +       |
| Copepods     | +                 | +  | +          | +  | +          | +  | +      | +       | +      | +       |
| Polychaetes  | +                 | +  | +          | +  | +          | +  | +      | +       | -      | +       |
| Ostracods    | +                 | +  | -          | -  | -          | -  | +      | +       | -      | +       |
| Kinorhynchs  | +                 | +  | +          | +  | -          | +  | -      | +       | +      | +       |
| Oligochaetes | -                 | -  | -          | -  | -          | -  | +      | -       | -      | -       |
| Tardigrades  | +                 | +  | +          | +  | +          | +  | +      | -       | +      | +       |
| Gastrotrichs | -                 | -  | +          | -  | +          | +  | -      | -       | -      | -       |
| Amphipods    | -                 | -  | -          | +  | -          | -  | -      | -       | -      | -       |
| Isopods      | -                 | +  | -          | -  | -          | +  | +      | +       | -      | +       |
| Acarines     | +                 | -  | -          | -  | -          | -  | +      | +       | +      | -       |
| Priapulids   | -                 | +  | -          | +  | +          | +  | +      | +       | -      | -       |
| Decapods     | -                 | +  | -          | -  | -          | -  | -      | -       | -      | -       |
| Gastropods   | -                 | -  | -          | -  | -          | +  | -      | -       | -      | -       |
| Bryozoans    | -                 | -  | -          | -  | -          | -  | -      | -       | -      | -       |

60

61

62 **Table S4.** Indices of meiofaunal and nematode diversity at all sampling sites. Reported are: richness of higher meiofauna l taxa (HTR), and, for  
63 nematodes, the Species Richness (SR), the index of Margalef (D), the Pielou's J, the expected species number ES(51), the Shannon-Wiener index  
64 (H') and the index of trophic diversity ((1-Θ); (avg = average; sd = standard deviation).

| Sampling site            | HTR | SR  | D    |      | J    |      | H    |      | SI   |      | ES(51) |      | 1-Θ  |      |
|--------------------------|-----|-----|------|------|------|------|------|------|------|------|--------|------|------|------|
|                          |     |     | avg  | sd   | avg  | sd   | avg  | sd   | avg  | sd   | avg    | sd   | avg  | sd   |
| Furrow 1a                | 5   | 49  | 5.44 | 1.97 | 0.95 | 0.04 | 2.63 | 0.68 | 0.97 | 0.02 | 18.38  | 8.92 | 0.70 | 0.03 |
| Furrow 1b                | 5   | 30  | 3.81 | 0.26 | 0.92 | 0.02 | 2.36 | 0.15 | 0.92 | 0.02 | 13.00  | 1.33 | 0.63 | 0.01 |
| Sand Wave 1              | 5   | 69  | 6.65 | 0.62 | 0.87 | 0.05 | 2.94 | 0.26 | 0.92 | 0.04 | 23.84  | 1.79 | 0.63 | 0.06 |
| Sand Wave 2              | 5   | 57  | 6.32 | 0.42 | 0.90 | 0.02 | 2.93 | 0.08 | 0.94 | 0.01 | 23.28  | 0.85 | 0.68 | 0.05 |
| Mud Wave 1down           | 7   | 60  | 7.01 | 0.19 | 0.86 | 0.03 | 3.00 | 0.14 | 0.92 | 0.03 | 24.25  | 1.20 | 0.62 | 0.06 |
| Mud Wave 1up             | 9   | 68  | 7.07 | 0.75 | 0.84 | 0.06 | 2.94 | 0.30 | 0.90 | 0.04 | 23.68  | 2.97 | 0.61 | 0.08 |
| Mud Wave 2 down          | 6   | 42  | 5.43 | 0.94 | 0.72 | 0.12 | 1.54 | 1.03 | 0.79 | 0.13 | 12.62  | 7.75 | 0.55 | 0.06 |
| Mud Wave 2 up            | 7   | 47  | 5.68 | 0.11 | 0.85 | 0.07 | 2.73 | 0.14 | 0.91 | 0.04 | 19.92  | 0.75 | 0.66 | 0.03 |
| Mud Wave 3 down          | 6   | 49  | 6.00 | 0.25 | 0.86 | 0.03 | 2.84 | 0.10 | 0.92 | 0.01 | 21.60  | 1.85 | 0.58 | 0.07 |
| Mud Wave 3 up            | 9   | 69  | 6.80 | 0.48 | 0.84 | 0.08 | 2.92 | 0.35 | 0.90 | 0.08 | 23.17  | 2.21 | 0.61 | 0.05 |
| Inside Trough            | 10  | 60  | 6.72 | 1.08 | 0.88 | 0.04 | 2.95 | 0.26 | 0.92 | 0.03 | 25.88  | 4.00 | 0.63 | 0.08 |
| Outside Trough           | 8   | 61  | 6.82 | 0.84 | 0.88 | 0.04 | 2.95 | 0.08 | 0.93 | 0.02 | 25.00  | 1.60 | 0.64 | 0.05 |
| Inside Scar              | 5   | 24  | 3.30 | 0.57 | 0.91 | 0.04 | 2.17 | 0.17 | 0.91 | 0.03 | 11.00  | 2.00 | 0.54 | 0.06 |
| Outside Scar             | 7   | 38  | 5.36 | 1.15 | 0.91 | 0.01 | 2.79 | 0.22 | 0.94 | 0.01 | 20.66  | 3.54 | 0.67 | 0.05 |
| Depositional Structure 1 | 8   | 49  | 5.64 | 1.21 | 0.94 | 0.04 | 2.75 | 0.30 | 0.96 | 0.02 | 20.39  | 6.93 | 0.66 | 0.04 |
| Depositional Structure 2 | 7   | 78  | 8.20 | 0.57 | 0.93 | 0.01 | 3.34 | 0.08 | 0.97 | 0.01 | 29.45  | 2.07 | 0.68 | 0.08 |
| Depositional Structure 3 | 8   | 58  | 6.80 | 0.59 | 0.94 | 0.01 | 3.18 | 0.07 | 0.96 | 0.00 | 26.45  | 2.11 | 0.64 | 0.02 |
| Draped Sediments         | 6   | 68  | 6.69 | 0.70 | 0.85 | 0.10 | 2.91 | 0.44 | 0.89 | 0.09 | 24.02  | 2.54 | 0.64 | 0.04 |
| Total (gamma)            | 15  | 250 | -    | -    | -    | -    | -    | -    | -    | -    | -      | -    | -    | -    |

65



66 **Table S5.** Dissimilarity in meiofaunal higher taxa (HT) and nematode species compositions in the  
67 investigated morphologies and structures. Reported are the results of the SIMPER and ANOSIM tests  
68 (\*\*\*) =  $p < 0.001$ ; \*\* =  $p < 0.01$ ; \* =  $p < 0.05$ ; ns = not significant).

| Contrast                            | Meiofaunal HT<br>composition |     |                         | Nematode species<br>composition |    |                         |
|-------------------------------------|------------------------------|-----|-------------------------|---------------------------------|----|-------------------------|
|                                     | ANOSIM                       |     | SIMPER<br>dissimilarity | ANOSIM                          |    | SIMPER<br>dissimilarity |
|                                     | R                            | P   | %                       | R                               | P  | %                       |
| Sediment Waves vs Furrow            | 0.00                         | ns  | 28                      | 0.32                            | *  | 74                      |
| Sediment Waves vs Draped Sediments  | -0.14                        | ns  | 25                      | 0.18                            | ns | 68                      |
| Sediment Waves vs Scar              | 0.13                         | ns  | 32                      | 0.31                            | *  | 72                      |
| Sediment Waves vs Trough            | 0.27                         | *   | 35                      | 0.21                            | ns | 69                      |
| Sediment Waves vs Dep. Structures   | -0.06                        | ns  | 26                      | 0.22                            | *  | 70                      |
| Furrow vs Draped Sediments          | 0.00                         | ns  | 23                      | 0.08                            | ns | 79                      |
| Furrow vs Scar                      | 0.32                         | *   | 33                      | 0.22                            | *  | 79                      |
| Furrow vs Trough                    | 0.57                         | **  | 32                      | 0.03                            | ns | 74                      |
| Furrow vs Dep. Structures           | 0.08                         | ns  | 24                      | 0.26                            | *  | 78                      |
| Draped Sediments vs Scar            | -0.02                        | ns  | 26                      | 0.15                            | ns | 71                      |
| Draped Sediments vs Trough          | 0.99                         | *   | 38                      | 0.12                            | ns | 71                      |
| Draped Sediments vs Dep. Structures | 0.21                         | ns  | 25                      | -0.12                           | ns | 68                      |
| Scar vs Trough                      | 0.89                         | **  | 48                      | 0.35                            | *  | 73                      |
| Scar vs Dep. Structures             | 0.39                         | **  | 32                      | 0.11                            | ns | 72                      |
| Trough vs Dep. Structures           | 0.57                         | *** | 29                      | 0.08                            | ns | 71                      |
| Mud vs sand                         | 0.17                         | ns  | 26                      | 0.41                            | *  | 70                      |
| Mud wave 1 vs 2                     | 0.16                         | ns  | 25                      | 0.10                            | ns | 66                      |
| Mud wave 1 vs 3                     | 0.00                         | ns  | 23                      | 0.22                            | *  | 59                      |
| Mud wave 2 vs 3                     | -0.11                        | ns  | 21                      | -0.03                           | ns | 63                      |
| Sand wave 1 vs 2                    | 0.07                         | ns  | 24                      | -0.19                           | ns | 68                      |
| Depositional Structure 1 vs 2       | 0.33                         | ns  | 24                      | 0.22                            | ns | 74                      |
| Depositional Structure 1 vs 3       | 0.67                         | ns  | 27                      | 0.30                            | ns | 73                      |
| Depositional Structure 2 vs 3       | 0.22                         | ns  | 19                      | 0.11                            | ns | 64                      |

69

70

71 **Table S6.** Nematode families in the investigated morphologies, structures and in the up-/down-slope  
72 flanks of the mud waves and in the sediment inside and outside the trough and the scar (+ indicate  
73 the presence of the family, - indicate its absence).

| Family                    | Morphologies |                   |        |      |                    |             |
|---------------------------|--------------|-------------------|--------|------|--------------------|-------------|
|                           | Furrow       | Sediment<br>Waves | Trough | Scar | Dep.<br>Structures | Draped Sed. |
| <i>Aegialoalaimidae</i>   | +            | +                 | +      | +    | +                  | +           |
| <i>Anoplostomatidae</i>   | -            | -                 | -      | +    | -                  | -           |
| <i>Bodonematidae</i>      | +            | -                 | -      | -    | -                  | -           |
| <i>Ceramonematidae</i>    | +            | +                 | +      | +    | +                  | +           |
| <i>Chromadoridae</i>      | +            | +                 | +      | +    | +                  | +           |
| <i>Comesomatidae</i>      | +            | +                 | +      | +    | +                  | +           |
| <i>Coninckiidae</i>       | -            | -                 | -      | +    | -                  | -           |
| <i>Cyatholaimidae</i>     | +            | +                 | +      | +    | +                  | +           |
| <i>Desmodoridae</i>       | +            | +                 | +      | +    | +                  | +           |
| <i>Desmoscolecidae</i>    | +            | +                 | +      | +    | +                  | +           |
| <i>Diplopeltidae</i>      | -            | +                 | +      | -    | -                  | -           |
| <i>Draconematidae</i>     | -            | -                 | -      | -    | -                  | -           |
| <i>Enchelidiidae</i>      | +            | +                 | +      | +    | +                  | +           |
| <i>Epsilonematidae</i>    | -            | -                 | +      | -    | +                  | +           |
| <i>Ironidae</i>           | +            | +                 | +      | +    | +                  | +           |
| <i>Lauratonematidae</i>   | -            | +                 | -      | -    | -                  | -           |
| <i>Leptolaimidae</i>      | -            | +                 | +      | -    | +                  | +           |
| <i>Leptosomatidae</i>     | +            | +                 | +      | -    | +                  | +           |
| <i>Linhomoeidae</i>       | +            | +                 | +      | +    | +                  | +           |
| <i>Meyliidae</i>          | +            | +                 | +      | +    | +                  | +           |
| <i>Microlaimidae</i>      | +            | +                 | +      | -    | +                  | +           |
| <i>Monhysteridae</i>      | +            | +                 | +      | +    | +                  | +           |
| <i>Oncholaimidae</i>      | -            | +                 | +      | +    | +                  | +           |
| <i>Oxystominidae</i>      | +            | +                 | +      | +    | +                  | +           |
| <i>Pandolaimidae</i>      | +            | -                 | +      | -    | -                  | -           |
| <i>Paramicrolaimidae</i>  | -            | -                 | -      | -    | -                  | -           |
| <i>Phanodermatidae</i>    | +            | +                 | +      | -    | +                  | +           |
| <i>Rhabdodemaniidae</i>   | -            | +                 | -      | -    | -                  | -           |
| <i>Selachinematidae</i>   | +            | +                 | +      | +    | +                  | +           |
| <i>Siphonolaimidae</i>    | -            | +                 | -      | -    | +                  | +           |
| <i>Sphaerolaimidae</i>    | +            | +                 | +      | +    | +                  | +           |
| <i>Symplocostomatidae</i> | -            | +                 | -      | -    | -                  | -           |
| <i>Thoracostomopsidae</i> | +            | +                 | -      | -    | -                  | -           |
| <i>Tripyloididae</i>      | -            | +                 | +      | -    | -                  | -           |
| <i>Xyalidae</i>           | +            | +                 | +      | +    | +                  | +           |

74

Table S6 (continue)

| Family                    | Structures  |             |            |            |            |                  |                  |                  |
|---------------------------|-------------|-------------|------------|------------|------------|------------------|------------------|------------------|
|                           | Sand Wave 1 | Sand Wave 2 | Mud Wave 1 | Mud Wave 2 | Mud Wave 3 | Dep. Structure 1 | Dep. Structure 2 | Dep. Structure 3 |
| <i>Aegialoalaimidae</i>   | +           | +           | +          | +          | +          | +                | +                | -                |
| <i>Anoplostomatidae</i>   | -           | -           | -          | -          | -          | -                | -                | -                |
| <i>Bodonematidae</i>      | -           | -           | -          | -          | -          | -                | -                | -                |
| <i>Ceramonematidae</i>    | +           | -           | +          | +          | +          | +                | +                | +                |
| <i>Chromadoridae</i>      | +           | +           | +          | +          | +          | +                | +                | +                |
| <i>Comesomatidae</i>      | +           | +           | +          | +          | +          | +                | +                | +                |
| <i>Coninckiidae</i>       | -           | -           | -          | -          | -          | -                | -                | -                |
| <i>Cyatholaimidae</i>     | +           | +           | +          | +          | +          | +                | +                | +                |
| <i>Desmodoridae</i>       | +           | +           | +          | +          | +          | +                | +                | +                |
| <i>Desmoscolecidae</i>    | +           | +           | +          | +          | +          | +                | +                | +                |
| <i>Diplopeltidae</i>      | -           | -           | +          | +          | +          | -                | -                | -                |
| <i>Draconematidae</i>     | -           | -           | -          | -          | -          | -                | -                | -                |
| <i>Enchelidiidae</i>      | +           | -           | +          | +          | +          | -                | +                | +                |
| <i>Epsilonematidae</i>    | -           | -           | -          | -          | -          | -                | -                | +                |
| <i>Ironidae</i>           | +           | +           | +          | +          | +          | +                | +                | +                |
| <i>Lauratonematidae</i>   | -           | -           | +          | -          | -          | -                | -                | -                |
| <i>Leptolaimidae</i>      | +           | -           | +          | -          | +          | -                | +                | -                |
| <i>Leptosomatidae</i>     | +           | -           | +          | -          | -          | +                | -                | +                |
| <i>Linhomoeidae</i>       | +           | -           | -          | +          | +          | -                | +                | -                |
| <i>Meyliidae</i>          | +           | +           | +          | +          | +          | +                | +                | +                |
| <i>Microalaimidae</i>     | +           | +           | +          | +          | +          | +                | +                | +                |
| <i>Monhysteridae</i>      | +           | +           | +          | +          | +          | +                | +                | +                |
| <i>Oncholaimidae</i>      | -           | +           | +          | +          | +          | -                | +                | -                |
| <i>Oxystominidae</i>      | +           | +           | +          | +          | +          | +                | +                | +                |
| <i>Pandolaimidae</i>      | -           | -           | -          | -          | -          | -                | -                | -                |
| <i>Paramicroalaimidae</i> | -           | -           | -          | -          | -          | -                | -                | -                |
| <i>Phanodermatidae</i>    | +           | +           | +          | +          | +          | -                | +                | +                |
| <i>Rhabdodemaniidae</i>   | -           | +           | -          | -          | -          | -                | -                | -                |
| <i>Selachinematidae</i>   | +           | +           | +          | +          | +          | +                | +                | +                |
| <i>Siphonolaimidae</i>    | -           | +           | -          | -          | -          | -                | +                | -                |
| <i>Sphaerolaimidae</i>    | +           | +           | +          | +          | +          | +                | +                | +                |
| <i>Symplocostomatidae</i> | -           | -           | -          | -          | +          | -                | -                | -                |
| <i>Thoracostomopsidae</i> | -           | -           | +          | +          | +          | -                | -                | -                |
| <i>Tripyloididae</i>      | +           | -           | -          | +          | +          | -                | -                | -                |
| <i>Xyalidae</i>           | +           | +           | +          | +          | +          | +                | +                | +                |

Table S6 (continue).

| Family                    | Inside Structures |    |            |    |            |    |        |         |        |         |
|---------------------------|-------------------|----|------------|----|------------|----|--------|---------|--------|---------|
|                           | Mud Wave 1        |    | Mud Wave 2 |    | Mud Wave 3 |    | Scar   |         | Trough |         |
|                           | Down              | Up | Down       | Up | Down       | Up | Inside | Outside | Inside | Outside |
| <i>Aegialoalaimidae</i>   | -                 | +  | -          | -  | +          | +  | -      | +       | +      | -       |
| <i>Anoplostomatidae</i>   | -                 | -  | -          | -  | -          | -  | -      | +       | -      | -       |
| <i>Bodonematidae</i>      | -                 | -  | -          | -  | -          | -  | -      | -       | -      | -       |
| <i>Ceramonematidae</i>    | +                 | +  | +          | +  | +          | +  | +      | +       | +      | +       |
| <i>Chromadoridae</i>      | +                 | +  | +          | +  | +          | +  | +      | +       | +      | +       |
| <i>Comesomatidae</i>      | +                 | +  | +          | +  | +          | +  | +      | +       | +      | +       |
| <i>Coninckiidae</i>       | -                 | -  | -          | -  | -          | -  | -      | +       | -      | -       |
| <i>Cyatholaimidae</i>     | +                 | +  | +          | +  | +          | +  | +      | +       | +      | +       |
| <i>Desmodoridae</i>       | +                 | +  | +          | +  | +          | +  | +      | -       | +      | +       |
| <i>Desmoscolecidae</i>    | +                 | +  | +          | +  | +          | +  | +      | +       | +      | +       |
| <i>Diplopeltidae</i>      | -                 | +  | +          | +  | -          | -  | -      | -       | +      | +       |
| <i>Draconematidae</i>     | -                 | -  | -          | -  | -          | -  | -      | -       | -      | -       |
| <i>Enchelidiidae</i>      | +                 | +  | +          | +  | -          | +  | -      | +       | +      | +       |
| <i>Epsilonematidae</i>    | -                 | -  | -          | -  | -          | -  | -      | -       | +      | -       |
| <i>Ironidae</i>           | +                 | +  | +          | +  | +          | +  | +      | -       | +      | +       |
| <i>Lauratonematidae</i>   | -                 | +  | -          | -  | -          | -  | -      | -       | -      | -       |
| <i>Leptolaimidae</i>      | -                 | +  | -          | +  | -          | +  | -      | -       | +      | -       |
| <i>Leptosomatidae</i>     | +                 | -  | -          | -  | -          | -  | -      | -       | +      | +       |
| <i>Linhomoeidae</i>       | -                 | -  | -          | +  | +          | -  | +      | -       | +      | -       |
| <i>Meyliidae</i>          | +                 | +  | +          | -  | +          | +  | -      | +       | +      | +       |
| <i>Microlaimidae</i>      | -                 | +  | +          | +  | +          | +  | -      | -       | +      | +       |
| <i>Monhysteridae</i>      | +                 | +  | +          | +  | +          | +  | +      | +       | +      | +       |
| <i>Oncholaimidae</i>      | -                 | +  | -          | +  | +          | +  | -      | +       | +      | +       |
| <i>Oxystominidae</i>      | +                 | +  | +          | +  | +          | +  | +      | +       | +      | +       |
| <i>Pandolaimidae</i>      | -                 | -  | -          | -  | -          | -  | -      | -       | +      | +       |
| <i>Paramicrolaimidae</i>  | -                 | -  | -          | -  | -          | -  | -      | -       | -      | -       |
| <i>Phanodermatidae</i>    | +                 | +  | +          | -  | +          | +  | -      | -       | -      | +       |
| <i>Rhabdodemaniidae</i>   | -                 | -  | -          | -  | -          | -  | -      | -       | -      | -       |
| <i>Selachinematidae</i>   | +                 | +  | +          | +  | +          | +  | +      | +       | +      | +       |
| <i>Siphonolaimidae</i>    | -                 | -  | -          | -  | -          | -  | -      | -       | -      | -       |
| <i>Sphaerolaimidae</i>    | +                 | +  | +          | +  | +          | +  | +      | +       | +      | +       |
| <i>Symplocostomatidae</i> | -                 | -  | -          | -  | -          | +  | -      | -       | -      | -       |
| <i>Thoracostomopsidae</i> | +                 | +  | +          | -  | +          | +  | -      | -       | -      | -       |
| <i>Tripyloididae</i>      | -                 | -  | +          | +  | -          | -  | -      | -       | +      | +       |
| <i>Xyalidae</i>           | +                 | +  | +          | +  | +          | +  | -      | +       | +      | +       |

79 **Table S7.** Relative abundances >1% of nematode genera (% on total abundance) in the investigated morphologies, structures and in the up-/down-  
80 slope flanks of the mud waves and in the sediment inside and outside the trough and the scar.

| Morphologies             |    |                          |    |                          |    |                          |    |                          |    |                          |    |
|--------------------------|----|--------------------------|----|--------------------------|----|--------------------------|----|--------------------------|----|--------------------------|----|
| Furrow                   |    | Sediment Waves           |    | Trough                   |    | Scar                     |    | Other Depos. Struct.     |    | Draped Sed.              |    |
| Genus                    | %  | Genus                    | %  | Genus                    | %  | Genus                    | %  | Genus                    | %  | Genus                    | %  |
| <i>Sabatieria</i>        | 19 | <i>Sabatieria</i>        | 26 | <i>Sabatieria</i>        | 26 | <i>Sabatieria</i>        | 28 | <i>Sabatieria</i>        | 17 | <i>Desmodora</i>         | 14 |
| <i>Desmoscolex</i>       | 8  | <i>Halalaimus</i>        | 8  | <i>Desmodora</i>         | 8  | <i>Acantholaimus</i>     | 12 | <i>Halalaimus</i>        | 7  | <i>Halomonhystera</i>    | 12 |
| <i>Sphaerolaimus</i>     | 7  | <i>Sphaerolaimus</i>     | 8  | <i>Halalaimus</i>        | 5  | <i>Sphaerolaimus</i>     | 8  | <i>Desmodora</i>         | 7  | <i>Sabatieria</i>        | 11 |
| <i>Amphimonhystrella</i> | 6  | <i>Acantholaimus</i>     | 6  | <i>Desmoscolex</i>       | 4  | <i>Halalaimus</i>        | 7  | <i>Desmoscolex</i>       | 6  | <i>Halalaimus</i>        | 9  |
| <i>Desmodora</i>         | 6  | <i>Desmoscolex</i>       | 5  | <i>Molgolaimus</i>       | 4  | <i>Amphimonhystrella</i> | 6  | <i>Sphaerolaimus</i>     | 5  | <i>Desmolorenzenia</i>   | 5  |
| <i>Halalaimus</i>        | 6  | <i>Syringolaimus</i>     | 4  | <i>Amphimonhystrella</i> | 3  | <i>Linhystra</i>         | 5  | <i>Acantholaimus</i>     | 4  | <i>Karkinochromadora</i> | 5  |
| <i>Acantholaimus</i>     | 5  | <i>Chromadorella</i>     | 4  | <i>Desmolorenzenia</i>   | 3  | <i>Desmolorenzenia</i>   | 4  | <i>Amphimonhystrella</i> | 4  | <i>Oxystomina</i>        | 4  |
| <i>Chromadorella</i>     | 5  | <i>Amphimonhystrella</i> | 3  | <i>Linhystra</i>         | 3  | <i>Richtersia</i>        | 4  | <i>Richtersia</i>        | 4  | <i>Sphaerolaimus</i>     | 4  |
| <i>Halichoanolaimus</i>  | 3  | <i>Desmodora</i>         | 3  | <i>Sphaerolaimus</i>     | 3  | <i>Desmoscolex</i>       | 3  | <i>Tricoma</i>           | 3  | <i>Endeolophos</i>       | 4  |
| <i>Spilophorella</i>     | 3  | <i>Halomonhystera</i>    | 2  | <i>Richtersia</i>        | 3  | <i>Halichoanolaimus</i>  | 3  | <i>Chromadorella</i>     | 2  | <i>Microlaimus</i>       | 3  |
| <i>Cobbia</i>            | 3  | <i>Pselionema</i>        | 2  | <i>Syringolaimus</i>     | 3  | <i>Oxystomina</i>        | 3  | <i>Desmolorenzenia</i>   | 2  | <i>Marylynnia</i>        | 3  |
| <i>Litinium</i>          | 3  | <i>Daptonema</i>         | 2  | <i>Acantholaimus</i>     | 2  | <i>Pselionema</i>        | 3  | <i>Oxystomina</i>        | 2  | <i>Syringolaimus</i>     | 3  |
| <i>Quadricoma</i>        | 3  | <i>Linhystra</i>         | 2  | <i>Setosabatieria</i>    | 2  | <i>Bathyeurystomina</i>  | 2  | <i>Karkinochromadora</i> | 2  | <i>Richtersia</i>        | 2  |
| <i>Bathyeurystomina</i>  | 2  | <i>Tricoma</i>           | 2  | <i>Halichoanolaimus</i>  | 1  | <i>Karkinochromadora</i> | 2  | <i>Microlaimus</i>       | 2  | <i>Linhystra</i>         | 2  |
| <i>Diplopeltoides</i>    | 2  | <i>Oxystomina</i>        | 2  | <i>Oxystomina</i>        | 1  | <i>Daptonema</i>         | 1  | <i>Pselionema</i>        | 2  | <i>Micoletzkyia</i>      | 2  |
| <i>Linhystra</i>         | 2  | <i>Halichoanolaimus</i>  | 2  | <i>Quadricoma</i>        | 1  | <i>Tricoma</i>           | 1  | <i>Bathyeurystomina</i>  | 2  | <i>Tricoma</i>           | 2  |
| <i>Bodonema</i>          | 1  | <i>Richtersia</i>        | 1  | <i>Bathyeurystomina</i>  | 1  |                          |    | <i>Syringolaimus</i>     | 2  | <i>Amphimonhystrella</i> | 1  |
| <i>Molgolaimus</i>       | 1  | <i>Endeolophos</i>       | 1  | <i>Pierrickia</i>        | 1  |                          |    | <i>Aponema</i>           | 2  | <i>Daptonema</i>         | 1  |
| <i>Oxystomina</i>        | 1  | <i>Cobbia</i>            | 1  | <i>Platycoma</i>         | 1  |                          |    | <i>Linhystra</i>         | 2  | <i>Pselionema</i>        | 1  |
| <i>Pareudesmoscolex</i>  | 1  | <i>Karkinochromadora</i> | 1  | <i>Tricoma</i>           | 1  |                          |    | <i>Halichoanolaimus</i>  | 2  | <i>Acantholaimus</i>     | 1  |
| <i>Richtersia</i>        | 1  | <i>Marylynnia</i>        | 1  | <i>Actinonema</i>        | 1  |                          |    | <i>Marylynnia</i>        | 2  | <i>Bathyeurystomina</i>  | 1  |
| <i>Syringolaimus</i>     | 1  |                          |    | <i>Cobbia</i>            | 1  |                          |    | <i>Cobbia</i>            | 1  | <i>Halichoanolaimus</i>  | 1  |
| <i>Tricoma</i>           | 1  |                          |    | <i>Desmogerlachia</i>    | 1  |                          |    | <i>Metacyatholaimus</i>  | 1  |                          |    |
|                          |    |                          |    | <i>Pselionema</i>        | 1  |                          |    | <i>Stygodesmodora</i>    | 1  |                          |    |
|                          |    |                          |    | <i>Spilophorella</i>     | 1  |                          |    | <i>Endeolophos</i>       | 1  |                          |    |
|                          |    |                          |    | <i>Viscosia</i>          | 1  |                          |    | <i>Molgolaimus</i>       | 1  |                          |    |
|                          |    |                          |    |                          |    |                          |    | <i>Phanoderma</i>        | 1  |                          |    |

Table S7 (continue)

| Sand Wave 1              |    | Sand Wave 2              |    | Structures<br>Mud Wave 1 |    | Mud Wave 2               |    | Mud Wave 3               |    |
|--------------------------|----|--------------------------|----|--------------------------|----|--------------------------|----|--------------------------|----|
| Genus                    | %  | Genus                    | %  | Genus                    | %  | Genus                    | %  | Genus                    | %  |
| <i>Sabatieria</i>        | 22 | <i>Sabatieria</i>        | 28 | <i>Sabatieria</i>        | 23 | <i>Sabatieria</i>        | 29 | <i>Sabatieria</i>        | 30 |
| <i>Halalaimus</i>        | 9  | <i>Syringolaimus</i>     | 10 | <i>Desmoscolex</i>       | 7  | <i>Sphaerolaimus</i>     | 16 | <i>Halalaimus</i>        | 11 |
| <i>Chromadorella</i>     | 6  | <i>Halalaimus</i>        | 8  | <i>Halalaimus</i>        | 7  | <i>Halalaimus</i>        | 8  | <i>Desmoscolex</i>       | 8  |
| <i>Cervonema</i>         | 5  | <i>Karkinochromadora</i> | 4  | <i>Sphaerolaimus</i>     | 6  | <i>Acantholaimus</i>     | 6  | <i>Acantholaimus</i>     | 8  |
| <i>Syringolaimus</i>     | 5  | <i>Desmodora</i>         | 4  | <i>Acantholaimus</i>     | 6  | <i>Syringolaimus</i>     | 4  | <i>Sphaerolaimus</i>     | 7  |
| <i>Acantholaimus</i>     | 5  | <i>Linhystra</i>         | 4  | <i>Halomonhystera</i>    | 5  | <i>Amphimonhystrella</i> | 4  | <i>Chromadorella</i>     | 5  |
| <i>Desmodora</i>         | 4  | <i>Sphaerolaimus</i>     | 4  | <i>Pselionema</i>        | 4  | <i>Chromadorella</i>     | 3  | <i>Amphimonhystrella</i> | 3  |
| <i>Amphimonhystrella</i> | 3  | <i>Halichoanolaimus</i>  | 3  | <i>Tricoma</i>           | 3  | <i>Southerniella</i>     | 3  | <i>Endeolophos</i>       | 3  |
| <i>Daptonema</i>         | 3  | <i>Chromadorella</i>     | 2  | <i>Oxystomina</i>        | 3  | <i>Desmoscolex</i>       | 2  | <i>Richtersia</i>        | 2  |
| <i>Karkinochromadora</i> | 3  | <i>Daptonema</i>         | 2  | <i>Syringolaimus</i>     | 3  | <i>Halomonhystera</i>    | 2  | <i>Syringolaimus</i>     | 2  |
| <i>Linhystra</i>         | 3  | <i>Desmolorenzenia</i>   | 2  | <i>Desmodora</i>         | 3  | <i>Halichoanolaimus</i>  | 2  | <i>Aponema</i>           | 2  |
| <i>Cobbia</i>            | 2  | <i>Acantholaimus</i>     | 2  | <i>Daptonema</i>         | 3  | <i>Desmodora</i>         | 2  | <i>Desmodora</i>         | 2  |
| <i>Desmoscolex</i>       | 2  | <i>Amphimonhystrella</i> | 2  | <i>Chromadorella</i>     | 2  | <i>Endeolophos</i>       | 2  | <i>Linhystra</i>         | 2  |
| <i>Sphaerolaimus</i>     | 2  | <i>Marylynnia</i>        | 2  | <i>Amphimonhystrella</i> | 2  | <i>Richtersia</i>        | 2  | <i>Tricoma</i>           | 2  |
| <i>Disconema</i>         | 2  | <i>Viscosia</i>          | 2  | <i>Halichoanolaimus</i>  | 2  | <i>Cobbia</i>            | 1  | <i>Desmogerlachia</i>    | 1  |
| <i>Marylynnia</i>        | 2  | <i>Wieseria</i>          | 2  | <i>Innocuonema</i>       | 2  | <i>Oxystomina</i>        | 1  | <i>Pselionema</i>        | 1  |
| <i>Oxystomina</i>        | 2  | <i>Aegialoalaimus</i>    | 1  | <i>Linhystra</i>         | 2  | <i>Pselionema</i>        | 1  | <i>Daptonema</i>         | 1  |
| <i>Desmolorenzenia</i>   | 2  | <i>Desmoscolex</i>       | 1  | <i>Bathyeurystomina</i>  | 2  |                          |    | <i>Halichoanolaimus</i>  | 1  |
| <i>Doliolaimus</i>       | 2  | <i>Elzalia</i>           | 1  | <i>Marylynnia</i>        | 1  |                          |    |                          |    |
| <i>Microlaimus</i>       | 2  | <i>Endeolophos</i>       | 1  | <i>Cobbia</i>            | 1  |                          |    |                          |    |
| <i>Euchromadora</i>      | 1  | <i>Halomonhystera</i>    | 1  | <i>Richtersia</i>        | 1  |                          |    |                          |    |
| <i>Micoletzkyia</i>      | 1  | <i>Metacyatholaimus</i>  | 1  | <i>Quadricoma</i>        | 1  |                          |    |                          |    |
| <i>Spirinia</i>          | 1  | <i>Metasphaerolaimus</i> | 1  |                          |    |                          |    |                          |    |
|                          |    | <i>Micoletzkyia</i>      | 1  |                          |    |                          |    |                          |    |
|                          |    | <i>Microlaimus</i>       | 1  |                          |    |                          |    |                          |    |
|                          |    | <i>Molgolaimus</i>       | 1  |                          |    |                          |    |                          |    |
|                          |    | <i>Oxystomina</i>        | 1  |                          |    |                          |    |                          |    |
|                          |    | <i>Tricoma</i>           | 1  |                          |    |                          |    |                          |    |

Table S7 (continue)

| Dep. Structure 1         |    | Structures               |    | Dep. Structure 3         |    |
|--------------------------|----|--------------------------|----|--------------------------|----|
| Genus                    | %  | Dep. Structure 2         | %  | Genus                    | %  |
| Genus                    | %  | Genus                    | %  | Genus                    | %  |
| <i>Sabatieria</i>        | 20 | <i>Sabatieria</i>        | 16 | <i>Sabatieria</i>        | 15 |
| <i>Desmodora</i>         | 16 | <i>Sphaerolaimus</i>     | 7  | <i>Desmoscolex</i>       | 10 |
| <i>Halalaimus</i>        | 8  | <i>Acantholaimus</i>     | 6  | <i>Halalaimus</i>        | 9  |
| <i>Sphaerolaimus</i>     | 7  | <i>Desmoscolex</i>       | 5  | <i>Desmodora</i>         | 6  |
| <i>Chromadorella</i>     | 6  | <i>Amphimonhystrella</i> | 4  | <i>Amphimonhystrella</i> | 5  |
| <i>Stygodesmodora</i>    | 5  | <i>Richtersia</i>        | 4  | <i>Richtersia</i>        | 4  |
| <i>Acantholaimus</i>     | 2  | <i>Tricoma</i>           | 4  | <i>Acantholaimus</i>     | 4  |
| <i>Halichoanolaimus</i>  | 2  | <i>Halalaimus</i>        | 4  | <i>Desmolorenzenia</i>   | 4  |
| <i>Karkinochromadora</i> | 2  | <i>Aponema</i>           | 3  | <i>Marylynnia</i>        | 4  |
| <i>Linhystra</i>         | 2  | <i>Metacyatholaimus</i>  | 3  | <i>Tricoma</i>           | 4  |
| <i>Quadricoma</i>        | 2  | <i>Oxystomina</i>        | 3  | <i>Bathyeurystomina</i>  | 3  |
| <i>Spilophorella</i>     | 2  | <i>Chromadorella</i>     | 3  | <i>Microlaimus</i>       | 3  |
| <i>Aponema</i>           | 2  | <i>Cobbia</i>            | 3  | <i>Endeolophos</i>       | 3  |
| <i>Desmolorenzenia</i>   | 2  | <i>Desmodora</i>         | 3  | <i>Pselionema</i>        | 3  |
| <i>Desmoscolex</i>       | 2  | <i>Karkinochromadora</i> | 3  | <i>Molgolaimus</i>       | 2  |
| <i>Halomonhystera</i>    | 2  | <i>Syringolaimus</i>     | 3  | <i>Karkinochromadora</i> | 2  |
| <i>Microlaimus</i>       | 2  | <i>Pselionema</i>        | 2  | <i>Linhystra</i>         | 2  |
| <i>Oxystomina</i>        | 2  | <i>Bathyeurystomina</i>  | 2  | <i>Oxystomina</i>        | 2  |
| <i>Richtersia</i>        | 2  | <i>Desmolorenzenia</i>   | 2  | <i>Phanoderma</i>        | 2  |
| <i>Syringolaimus</i>     | 2  | <i>Elzalia</i>           | 2  | <i>Halichoanolaimus</i>  | 1  |
|                          |    | <i>Microlaimus</i>       | 2  | <i>Syringolaimus</i>     | 1  |
|                          |    | <i>Halichoanolaimus</i>  | 1  |                          |    |
|                          |    | <i>Linhystra</i>         | 1  |                          |    |
|                          |    | <i>Theristus</i>         | 1  |                          |    |

Table S7 (continue)

| Inside structures        |    |                          |    |                          |    |                          |    |                          |    |                          |    |
|--------------------------|----|--------------------------|----|--------------------------|----|--------------------------|----|--------------------------|----|--------------------------|----|
| Mud Wave 1               |    |                          |    | Mud Wave 2               |    |                          |    | Mud Wave 3               |    |                          |    |
| Down<br>Genus            | %  | Up<br>Genus              | %  | Down<br>Genus            | %  | Up<br>Genus              | %  | Down<br>Genus            | %  | Up<br>Genus              | %  |
| <i>Sabatieria</i>        | 16 | <i>Sabatieria</i>        | 29 | <i>Sphaerolaimus</i>     | 27 | <i>Sabatieria</i>        | 33 | <i>Sabatieria</i>        | 34 | <i>Sabatieria</i>        | 26 |
| <i>Desmoscolex</i>       | 13 | <i>Halalaimus</i>        | 9  | <i>Sabatieria</i>        | 23 | <i>Halalaimus</i>        | 10 | <i>Halalaimus</i>        | 11 | <i>Halalaimus</i>        | 10 |
| <i>Halomonhystera</i>    | 9  | <i>Acantholaimus</i>     | 7  | <i>Chromadorella</i>     | 6  | <i>Sphaerolaimus</i>     | 9  | <i>Sphaerolaimus</i>     | 9  | <i>Desmoscolex</i>       | 8  |
| <i>Sphaerolaimus</i>     | 7  | <i>Oxystomina</i>        | 6  | <i>Halomonhystera</i>    | 6  | <i>Acantholaimus</i>     | 8  | <i>Acantholaimus</i>     | 8  | <i>Acantholaimus</i>     | 7  |
| <i>Tricoma</i>           | 6  | <i>Sphaerolaimus</i>     | 5  | <i>Southerniella</i>     | 6  | <i>Amphimonhystrella</i> | 6  | <i>Desmoscolex</i>       | 8  | <i>Chromadorella</i>     | 6  |
| <i>Pselionema</i>        | 5  | <i>Syringolaimus</i>     | 5  | <i>Halalaimus</i>        | 5  | <i>Syringolaimus</i>     | 6  | <i>Chromadorella</i>     | 3  | <i>Sphaerolaimus</i>     | 5  |
| <i>Halalaimus</i>        | 5  | <i>Daptonema</i>         | 3  | <i>Acantholaimus</i>     | 3  | <i>Richtersia</i>        | 3  | <i>Amphimonhystrella</i> | 3  | <i>Richtersia</i>        | 4  |
| <i>Acantholaimus</i>     | 5  | <i>Desmodora</i>         | 3  | <i>Desmodora</i>         | 2  | <i>Desmoscolex</i>       | 2  | <i>Aponema</i>           | 1  | <i>Endeolophos</i>       | 4  |
| <i>Innocuonema</i>       | 4  | <i>Cobbia</i>            | 3  | <i>Desmoscolex</i>       | 2  | <i>Halichoanolaimus</i>  | 2  | <i>Daptonema</i>         | 1  | <i>Amphimonhystrella</i> | 3  |
| <i>Chromadorella</i>     | 3  | <i>Halichoanolaimus</i>  | 2  | <i>Syringolaimus</i>     | 2  | <i>Endeolophos</i>       | 2  | <i>Desmodora</i>         | 1  | <i>Desmogerlachia</i>    | 2  |
| <i>Desmodora</i>         | 3  | <i>Pselionema</i>        | 2  | <i>Halichoanolaimus</i>  | 2  | <i>Chromadorella</i>     | 2  | <i>Endeolophos</i>       | 1  | <i>Linhystera</i>        | 2  |
| <i>Daptonema</i>         | 2  | <i>Amphimonhystrella</i> | 2  | <i>Pselionema</i>        | 2  | <i>Cobbia</i>            | 2  | <i>Halichoanolaimus</i>  | 1  | <i>Syringolaimus</i>     | 2  |
| <i>Quadricoma</i>        | 2  | <i>Bathyeurystomina</i>  | 2  | <i>Amphimonhystrella</i> | 1  | <i>Desmodora</i>         | 2  | <i>Syringolaimus</i>     | 1  | <i>Aponema</i>           | 2  |
| <i>Amphimonhystrella</i> | 2  | <i>Chromadorella</i>     | 2  | <i>Cobbia</i>            | 1  | <i>Bathyeurystomina</i>  | 1  | <i>Elzalia</i>           | 1  | <i>Desmodora</i>         | 2  |
| <i>Linhystera</i>        | 2  | <i>Desmoscolex</i>       | 2  | <i>Endeolophos</i>       | 1  | <i>Karkinochromadora</i> | 1  | <i>Karkinochromadora</i> | 1  | <i>Tricoma</i>           | 2  |
| <i>Marylynnia</i>        | 2  | <i>Linhystera</i>        | 2  | <i>Oxystomina</i>        | 1  | <i>Oxystomina</i>        | 1  | <i>Marylynnia</i>        | 1  | <i>Pselionema</i>        | 2  |
| <i>Paracanthochus</i>    | 2  | <i>Richtersia</i>        | 2  | <i>Tricoma</i>           | 1  |                          |    | <i>Pselionema</i>        | 1  | <i>Leptolaimus</i>       | 1  |
| <i>Bathyeurystomina</i>  | 1  | <i>Vasostoma</i>         | 2  |                          |    |                          |    | <i>Tricoma</i>           | 1  | <i>Viscosia</i>          | 1  |
| <i>Halichoanolaimus</i>  | 1  | <i>Marylynnia</i>        | 1  |                          |    |                          |    |                          |    |                          |    |
| <i>Camacolaimus</i>      | 1  | <i>Tricoma</i>           | 1  |                          |    |                          |    |                          |    |                          |    |
| <i>Molgolaimus</i>       | 1  |                          |    |                          |    |                          |    |                          |    |                          |    |
| <i>Richtersia</i>        | 1  |                          |    |                          |    |                          |    |                          |    |                          |    |



Table S7 (continue)

| Inside structures        |    |                          |    |                          |    |                          |    |
|--------------------------|----|--------------------------|----|--------------------------|----|--------------------------|----|
| Trough                   |    |                          |    | Scar                     |    |                          |    |
| Inside Genus             | %  | Outside Genus            | %  | Inside Genus             | %  | Outside Genus            | %  |
| <i>Sabatieria</i>        | 23 | <i>Sabatieria</i>        | 30 | <i>Sabatieria</i>        | 36 | <i>Sabatieria</i>        | 25 |
| <i>Molgolaimus</i>       | 7  | <i>Desmodora</i>         | 10 | <i>Sphaerolaimus</i>     | 14 | <i>Acantholaimus</i>     | 14 |
| <i>Desmodora</i>         | 6  | <i>Desmoscolex</i>       | 6  | <i>Desmoscolex</i>       | 9  | <i>Linhystera</i>        | 7  |
| <i>Desmolorenzenia</i>   | 6  | <i>Halalaimus</i>        | 5  | <i>Halalaimus</i>        | 9  | <i>Desmolorenzenia</i>   | 6  |
| <i>Halalaimus</i>        | 5  | <i>Amphimonhystrella</i> | 4  | <i>Acantholaimus</i>     | 6  | <i>Halalaimus</i>        | 6  |
| <i>Linhystera</i>        | 4  | <i>Richtersia</i>        | 3  | <i>Amphimonhystrella</i> | 6  | <i>Amphimonhystrella</i> | 5  |
| <i>Sphaerolaimus</i>     | 4  | <i>Syringolaimus</i>     | 3  | <i>Halichoanolaimus</i>  | 4  | <i>Richtersia</i>        | 5  |
| <i>Amphimonhystrella</i> | 3  | <i>Acantholaimus</i>     | 3  | <i>Pselionema</i>        | 4  | <i>Sphaerolaimus</i>     | 5  |
| <i>Desmoscolex</i>       | 3  | <i>Linhystera</i>        | 3  | <i>Cervonema</i>         | 3  | <i>Oxystomina</i>        | 4  |
| <i>Oxystomina</i>        | 3  | <i>Setosabatieria</i>    | 3  | <i>Desmodora</i>         | 3  | <i>Bathyeurystomina</i>  | 2  |
| <i>Richtersia</i>        | 3  | <i>Sphaerolaimus</i>     | 3  | <i>Disconema</i>         | 1  | <i>Halichoanolaimus</i>  | 2  |
| <i>Syringolaimus</i>     | 3  | <i>Actinonema</i>        | 2  | <i>Marylynnia</i>        | 1  | <i>Karkinochromadora</i> | 2  |
| <i>Acantholaimus</i>     | 2  | <i>Halichoanolaimus</i>  | 2  | <i>Richtersia</i>        | 1  | <i>Daptonema</i>         | 2  |
| <i>Cobbia</i>            | 2  | <i>Platycoma</i>         | 2  | <i>Setosabatieria</i>    | 1  | <i>Pselionema</i>        | 2  |
| <i>Pierrickia</i>        | 2  | <i>Pselionema</i>        | 2  | <i>Syringolaimus</i>     | 1  | <i>Tricoma</i>           | 2  |
| <i>Amphimonhystera</i>   | 1  | <i>Spilophorella</i>     | 2  |                          |    | <i>Acatarjania</i>       | 1  |
| <i>Araeolaimus</i>       | 1  | <i>Endeolophos</i>       | 2  |                          |    | <i>Cobbia</i>            | 1  |
| <i>Bathyeurystomina</i>  | 1  | <i>Quadricoma</i>        | 2  |                          |    | <i>Desmoscolex</i>       | 1  |
| <i>Desmogerlachia</i>    | 1  | <i>Alaimella</i>         | 1  |                          |    | <i>Euchromadora</i>      | 1  |
| <i>Quadricoma</i>        | 1  | <i>Bathyeurystomina</i>  | 1  |                          |    | <i>Viscosia</i>          | 1  |
| <i>Setosabatieria</i>    | 1  | <i>Campylaimus</i>       | 1  |                          |    | <i>Aegialoalaimus</i>    | 1  |
| <i>Tricoma</i>           | 1  | <i>Desmolorenzenia</i>   | 1  |                          |    | <i>Anoplostoma</i>       | 1  |
|                          |    | <i>Filoncholaimus</i>    | 1  |                          |    | <i>Coninckia</i>         | 1  |
|                          |    | <i>Karkinochromadora</i> | 1  |                          |    | <i>Diplopeltoides</i>    | 1  |
|                          |    | <i>Pandolaimus</i>       | 1  |                          |    | <i>Marylynnia</i>        | 1  |
|                          |    | <i>Pareurystomina</i>    | 1  |                          |    |                          |    |
|                          |    | <i>Phanodermopsis</i>    | 1  |                          |    |                          |    |
|                          |    | <i>Tricoma</i>           | 1  |                          |    |                          |    |
|                          |    | <i>Viscosia</i>          | 1  |                          |    |                          |    |

**Figure S1. Vertical meiofaunal distribution in sediment layers of the different seafloor morphologies.** Reported are nematodes, copepods, tardigrades and others (polychaetes, ostracods, gastrotrichs, amphipods, isopods, acarines, priapulids, decapods, gastropods and kinorhynchs).

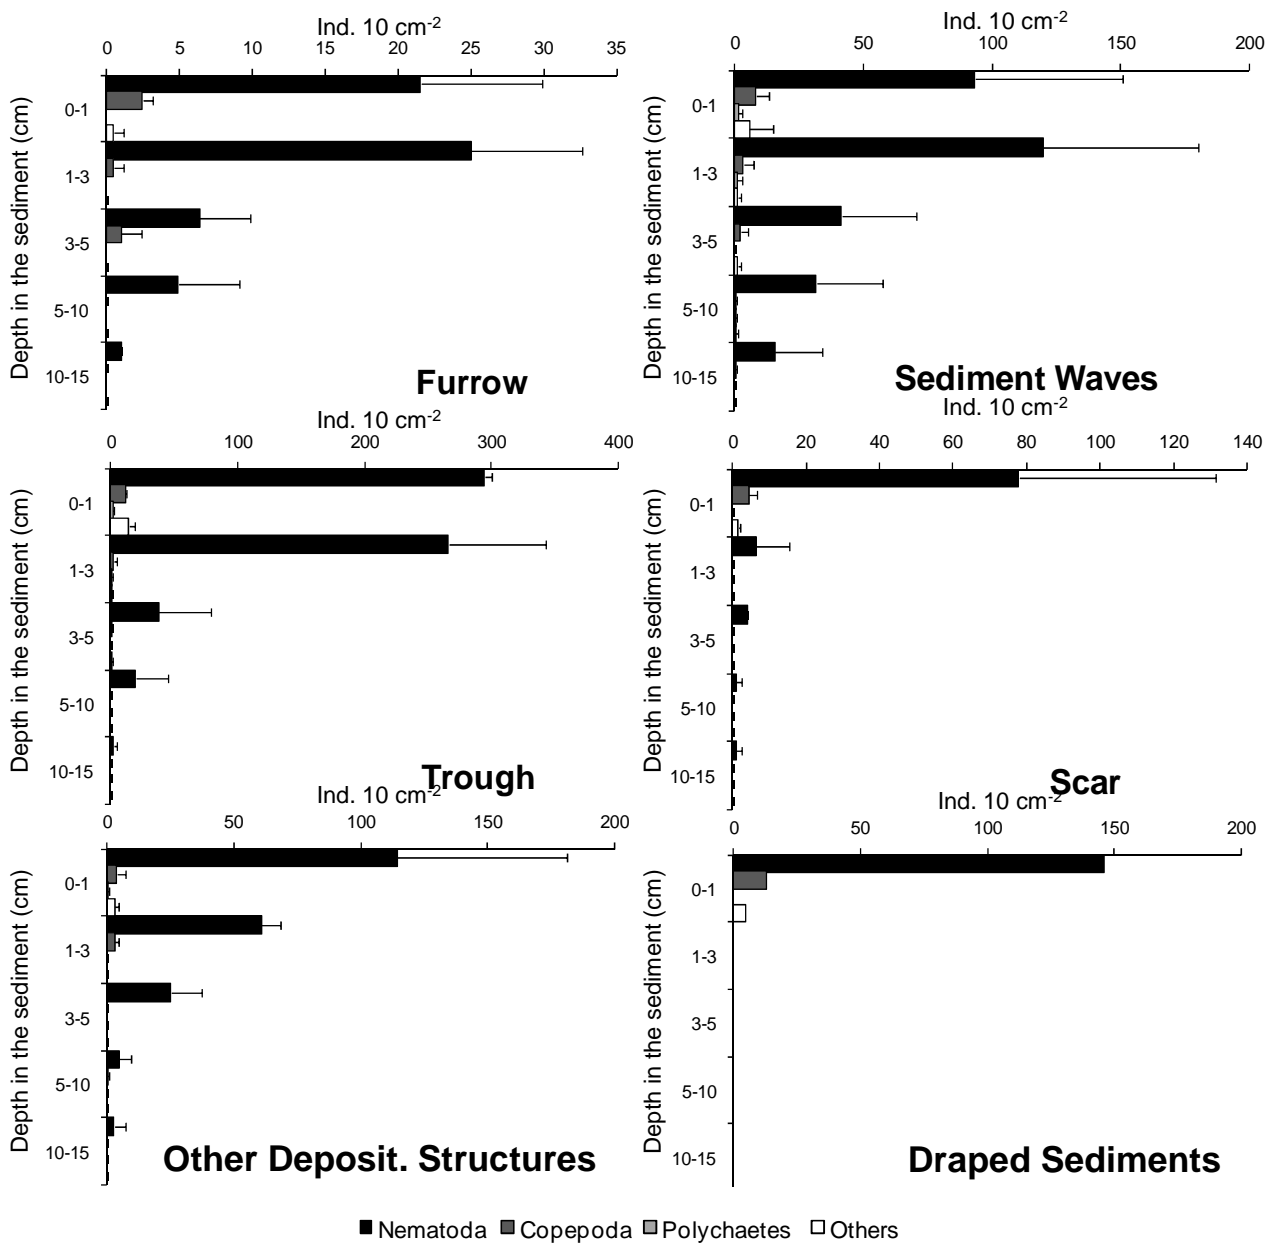

Supplement: srep26352-s1.pdf [file srep26352-s1.pdf]
